# Supplementary material for: Identifying miRNA sponge modules using biclustering and regulatory scores
Source: BMC Bioinformatics. 2017 Mar 14;18(Suppl 3):44. doi: 10.1186/s12859-017-1467-5 (PMC5374547; doi:10.1186/s12859-017-1467-5)
Supplement: Supplementary file 3 — The list of BRCA miRNAs, BRCA genes, and cancer hallmark genes. There are 428 BRCA miRNAs, 2949 BRCA genes and 2224 cancer hallmark genes. (XLSX 77 kb) [file 12859_2017_1467_MOESM3_ESM.xlsx]

## Sheet: BRCA miRNAs
BRCA miRNAs
hsa-let-7
hsa-let-7a-1
hsa-let-7a-2
hsa-let-7a-3
hsa-let-7a-5p
hsa-let-7b-5p
hsa-let-7c
hsa-let-7d-5p
hsa-let-7e-5p
hsa-let-7f-1
hsa-let-7f-2
hsa-let-7f-5p
hsa-let-7g-5p
hsa-let-7i-5p
hsa-miR-1
hsa-miR-10*
hsa-miR-100-5p
hsa-miR-101-1
hsa-miR-101-2
hsa-miR-101-3p
hsa-miR-103-1
hsa-miR-103-2
hsa-miR-103a-3p
hsa-miR-105-1
hsa-miR-105-2
hsa-miR-106a-5p
hsa-miR-106b~25
hsa-miR-106b-5p
hsa-miR-107
hsa-miR-10a-5p
hsa-miR-10b-5p
hsa-miR-1-1
hsa-miR-1-2
hsa-miR-122-5p
hsa-miR-1226
hsa-miR-1228-3p
hsa-miR-1229
hsa-miR-124-1
hsa-miR-124-2
hsa-miR-124-3
hsa-miR-124-3p
hsa-miR-1245a
hsa-miR-1245b
hsa-miR-124a
hsa-miR-124a-3
hsa-miR-1258
hsa-miR-125a-5p
hsa-miR-125b-1
hsa-miR-125b-2
hsa-miR-125b-5p
hsa-miR-126-3p
hsa-miR-126-5p
hsa-miR-127-3p
hsa-miR-128
hsa-miR-128-1
hsa-miR-128-2
hsa-miR-1291
hsa-miR-129-1
hsa-miR-129-2
hsa-miR-1295
hsa-miR-129-5p
hsa-miR-1296
hsa-miR-130a-3p
hsa-miR-130b-3p
hsa-miR-1323
hsa-miR-132-3p
hsa-miR-133a
hsa-miR-133a-1
hsa-miR-133a-2
hsa-miR-133b
hsa-miR-134
hsa-miR-135a
hsa-miR-135a-1
hsa-miR-135a-2
hsa-miR-135b-5p
hsa-miR-136-5p
hsa-miR-137
hsa-miR-138-1
hsa-miR-138-2
hsa-miR-139
hsa-miR-139-5p
hsa-miR-140-5p
hsa-miR-141-3p
hsa-miR-142
hsa-miR-142-3p
hsa-miR-143-3p
hsa-miR-144-3p
hsa-miR-145-5p
hsa-miR-146
hsa-miR-1469
hsa-miR-146a-5p
hsa-miR-146b-5p
hsa-miR-1471
hsa-miR-147a
hsa-miR-148a-3p
hsa-miR-148b-3p
hsa-miR-149-5p
hsa-miR-150-5p
hsa-miR-151a-3p
hsa-miR-152
hsa-miR-153
hsa-miR-153-1
hsa-miR-153-2
hsa-miR-154-5p
hsa-miR-155-5p
hsa-miR-15a-5p
hsa-miR-15b-5p
hsa-miR-16-2
hsa-miR-16-5p
hsa-miR-170
hsa-miR-17-5p
hsa-miR-181a-1
hsa-miR-181a-2
hsa-miR-181a-5p
hsa-miR-181b-1
hsa-miR-181b-2
hsa-miR-181b-5p
hsa-miR-181c-5p
hsa-miR-181d
hsa-miR-182-5p
hsa-miR-1826
hsa-miR-183-5p
hsa-miR-184
hsa-miR-185-5p
hsa-miR-186-5p
hsa-miR-187-3p
hsa-miR-188-5p
hsa-miR-18a-5p
hsa-miR-18b-5p
hsa-miR-19
hsa-miR-190a
hsa-miR-1915-3p
hsa-miR-191-5p
hsa-miR-192-5p
hsa-miR-193a-3p
hsa-miR-193b-3p
hsa-miR-194-1
hsa-miR-194-2
hsa-miR-194-5p
hsa-miR-195-5p
hsa-miR-196a-1
hsa-miR-196a-2
hsa-miR-196a-5p
hsa-miR-196b-5p
hsa-miR-197-3p
hsa-miR-198
hsa-miR-199a-1
hsa-miR-199a-2
hsa-miR-199a-3p
hsa-miR-199a-5p
hsa-miR-199b-5p
hsa-miR-19a-3p
hsa-miR-19b-1
hsa-miR-19b-2
hsa-miR-19b-3p
hsa-miR-20
hsa-miR-200
hsa-miR-200a-3p
hsa-miR-200b-3p
hsa-miR-200ba~429
hsa-miR-200c~141
hsa-miR-200c-3p
hsa-miR-202-3p
hsa-miR-203
hsa-miR-204-5p
hsa-miR-205-5p
hsa-miR-206
hsa-miR-208a
hsa-miR-20a-5p
hsa-miR-20b-5p
hsa-miR-210
hsa-miR-211
hsa-miR-212-3p
hsa-miR-213
hsa-miR-214-3p
hsa-miR-215
hsa-miR-21-5p
hsa-miR-216a
hsa-miR-216b
hsa-miR-217
hsa-miR-218-1
hsa-miR-218-2
hsa-miR-218-5p
hsa-miR-219
hsa-miR-219-1
hsa-miR-219-2
hsa-miR-220
hsa-miR-220a
hsa-miR-221-3p
hsa-miR-222-3p
hsa-miR-223-3p
hsa-miR-22-3p
hsa-miR-224-5p
hsa-miR-2355
hsa-miR-23a-3p
hsa-miR-23b-3p
hsa-miR-24-1
hsa-miR-24-2
hsa-miR-24-2*
hsa-miR-24-2-5p
hsa-miR-24-3p
hsa-miR-25-3p
hsa-miR-26a-1
hsa-miR-26a-2
hsa-miR-26a-5p
hsa-miR-26b-5p
hsa-miR-27a-3p
hsa-miR-27b-3p
hsa-miR-28-5p
hsa-miR-29
hsa-miR-290-3p
hsa-miR-296-5p
hsa-miR-298
hsa-miR-299
hsa-miR-29a-3p
hsa-miR-29b-1
hsa-miR-29b-2
hsa-miR-29b-3p
hsa-miR-29c-3p
hsa-miR-30
hsa-miR-300
hsa-miR-301a-3p
hsa-miR-301b
hsa-miR-302
hsa-miR-302a-3p
hsa-miR-302b-3p
hsa-miR-302c
hsa-miR-302d
hsa-miR-30a-3p
hsa-miR-30a-5p
hsa-miR-30b-5p
hsa-miR-30c-1
hsa-miR-30c-2
hsa-miR-30c-5p
hsa-miR-30d-5p
hsa-miR-30e-5p
hsa-miR-312
hsa-miR-3130
hsa-miR-31-5p
hsa-miR-3186
hsa-miR-31a
hsa-miR-320a
hsa-miR-320b
hsa-miR-320c
hsa-miR-320d
hsa-miR-320e
hsa-miR-323
hsa-miR-323b-5p
hsa-miR-324
hsa-miR-325
hsa-miR-32-5p
hsa-miR-326
hsa-miR-328
hsa-miR-329
hsa-miR-329-1
hsa-miR-329-2
hsa-miR-330-3p
hsa-miR-331-3p
hsa-miR-335-5p
hsa-miR-337
hsa-miR-338
hsa-miR-339-5p
hsa-miR-33a-5p
hsa-miR-33b-5p
hsa-miR-340-5p
hsa-miR-342-3p
hsa-miR-345-5p
hsa-miR-346
hsa-miR-34a-5p
hsa-miR-34b-3p
hsa-miR-34c
hsa-miR-355
hsa-miR-361-5p
hsa-miR-362-3p
hsa-miR-365-1
hsa-miR-365-2
hsa-miR-365a-3p
hsa-miR-367
hsa-miR-369
hsa-miR-370
hsa-miR-371a-3p
hsa-miR-372
hsa-miR-373-3p
hsa-miR-374a-5p
hsa-miR-375
hsa-miR-376a-1
hsa-miR-376b
hsa-miR-376c
hsa-miR-377
hsa-miR-378a-3p
hsa-miR-378a-5p
hsa-miR-379-5p
hsa-miR-380
hsa-miR-381
hsa-miR-382-5p
hsa-miR-383
hsa-miR-409
hsa-miR-409-3p
hsa-miR-410
hsa-miR-411-5p
hsa-miR-412
hsa-miR-422a
hsa-miR-423-3p
hsa-miR-424-5p
hsa-miR-425-5p
hsa-miR-4257
hsa-miR-429
hsa-miR-4306
hsa-miR-431-5p
hsa-miR-432-5p
hsa-miR-433
hsa-miR-448
hsa-miR-449a
hsa-miR-450a-5p
hsa-miR-450b
hsa-miR-450b-3p
hsa-miR-451a
hsa-miR-452-5p
hsa-miR-454-3p
hsa-miR-455
hsa-miR-483-3p
hsa-miR-484
hsa-miR-485
hsa-miR-486-5p
hsa-miR-487a
hsa-miR-488
hsa-miR-489
hsa-miR-489-5p
hsa-miR-491-5p
hsa-miR-493-3p
hsa-miR-494
hsa-miR-495
hsa-miR-496
hsa-miR-497-5p
hsa-miR-498
hsa-miR-499a-5p
hsa-miR-501
hsa-miR-502-5p
hsa-miR-503
hsa-miR-505-3p
hsa-miR-506
hsa-miR-510
hsa-miR-512-1
hsa-miR-512-2
hsa-miR-513a
hsa-miR-515-1
hsa-miR-515-2
hsa-miR-516-3p
hsa-miR-516a
hsa-miR-516a-1
hsa-miR-516a-2
hsa-miR-516b-1
hsa-miR-516b-2
hsa-miR-516b-5p
hsa-miR-517a-3p
hsa-miR-517b-3p
hsa-miR-517c-3p
hsa-miR-518a-1
hsa-miR-518a-2
hsa-miR-518b
hsa-miR-518c
hsa-miR-518d-3p
hsa-miR-518e-3p
hsa-miR-518f-3p
hsa-miR-519a-1
hsa-miR-519a-2
hsa-miR-519b-3p
hsa-miR-519c
hsa-miR-519d
hsa-miR-519e
hsa-miR-520a
hsa-miR-520b
hsa-miR-520c
hsa-miR-520d
hsa-miR-520e
hsa-miR-520f
hsa-miR-520g
hsa-miR-520h
hsa-miR-521-1
hsa-miR-521-2
hsa-miR-522-3p
hsa-miR-523-3p
hsa-miR-524-3p
hsa-miR-525
hsa-miR-526a
hsa-miR-526a-1
hsa-miR-526a-2
hsa-miR-526b
hsa-miR-527
hsa-miR-574-3p
hsa-miR-580
hsa-miR-625-5p
hsa-miR-629-5p
hsa-miR-630
hsa-miR-632
hsa-miR-638
hsa-miR-652-3p
hsa-miR-661
hsa-miR-662
hsa-miR-663a
hsa-miR-663b
hsa-miR-671-5p
hsa-miR-675-5p
hsa-miR-718
hsa-miR-7-2
hsa-miR-720
hsa-miR-7-3
hsa-miR-7-5p
hsa-miR-762
hsa-miR-802
hsa-miR-873
hsa-miR-874
hsa-miR-892b
hsa-miR-9-1
hsa-miR-9-2
hsa-miR-922
hsa-miR-92a-1
hsa-miR-92a-2
hsa-miR-92a-3p
hsa-miR-9-3
hsa-miR-93-5p
hsa-miR-944
hsa-miR-95
hsa-miR-9-5p
hsa-miR-96-5p
hsa-miR-98
hsa-miR-99a-5p
hsa-miR-99b-5p

## Sheet: BRCA genes
BRCA genes
2016-12-01
AAMP
AARS
AATF
ABAT
ABCA1
ABCA2
ABCA3
ABCB1
ABCC11
ABCC2
ABCC4
ABCC6
ABCC8
ABCD3
ABCG1
ABHD2
ABL1
ABL2
ABLIM3
ABO
ACAA2
ACACA
ACAD10
ACADM
ACADS
ACADSB
ACAT2
ACD
ACE
ACN9
ACOT7
ACOT9
ACOX2
ACOX3
ACP5
ACPP
ACTB
ACTG1
ACTG2
ACTR1A
ACVR1
ACVR2A
ACVR2B
ACY1
ADA
ADAM15
ADAM17
ADAM23
ADAM8
ADAMDEC1
ADAMTS1
ADAMTS18
ADARB1
ADCY9
ADD1
ADD2
ADD3
ADFP
ADH1A
ADH1B
ADH1C
ADIPOQ
ADIPOR1
ADIPOR2
ADK
ADM
ADNP
ADORA2A
ADORA2B
ADPRTL4
ADRB2
ADRB3
ADSL
AFF3
AFP
AGR2
AGT
AGTPBP1
AGTR1
AGTR2
AHCY
AHR
AIB1
AIF1
AIG1
AIM1
AIM2
AIP
AK2
AKAP10
AKAP12
AKAP13
AKAP9
AKR1B1
AKR1C1
AKR1C2
AKR1C3
AKR1C4
AKR7A2
AKR7A3
AKT1
AKT2
ALCAM
ALDH1A1
ALDH1A2
ALDH1A3
ALDH1L1
ALDH2
ALDH3A1
ALDH3A2
ALDH4A1
ALDH6A1
ALDH9A1
ALG6
ALK
ALOX12
ALOX12B
ALOX5AP
ALPK3
ALPS2B
AMAC1L3
AMD1
AMFR
AMPD1
AMPD3
AMY1A
AMY2A
AMY2B
ANG
ANGPTL4
ANK3
ANKLE1
ANKRD10
ANLN
ANXA1
ANXA11
ANXA3
ANXA9
AOC3
AP1M2
AP2B1
APBB2
APC
APEH
APEX1
APH1A
APLP2
APOA1
APOD
APOE
APPBP2
AQP1
AQP3
AQP7
AQP9
AQR
AR
ARCN1
AREG
ARFGAP3
ARG2
ARHGAP10
ARHGAP21
ARHGAP4
ARHGAP8
ARHGDIB
ARHGEF16
ARHGEF2
ARHGEF6
ARID1A
ARID1B
ARL11
ARL3
ARMC1
ARNT2
ARPC1B
ARPC3
ARPC5
ARRDC2
ARSA
ART3
ARTS-1
ARVCF
ASAH1
ASB9
ASNS
ASPM
ASPN
AT
AT1
ATA
ATAD2
ATF1
ATF3
ATF4
ATM
ATP11B
ATP1B2
ATP1B3
ATP2A2
ATP2C1
ATP5C1
ATP5G3
ATP6AP1
ATP6V0A2
ATP6V1C1
ATP7B
ATPAF2
ATR
ATRIP
ATRX
AURKA
AURKB
AURKC
AXIN1
AXIN2
AZGP1
BACE2
BACH1
BAD
BAG1
BAG3
BAG4
BAI2
BAIAP3
BAP1
BARD1
BASE
BAX
BAZ2B
BB1
BBC3
BBOX1
BBS2
BBS4
BCAR1
BCAR3
BCAR4
BCAS1
BCAS2
BCAS3
BCAS4
BCC7
BCCIP
BCEI
BCL1
BCL10
BCL11A
BCL2
BCL2A1
BCL7B
BCPR
BCSG1
BECN1
BGN
BHLHB2
BHMT
BID
BIN1
BIN2
BIRC2
BIRC3
BIRC5
BLCAP
BLM
BLMH
BLVRA
BMP4
BMP6
BMP7
BMPR1B
BMPR2
BNAH2
BNC1
BNIP2
BNIP3
BOP1
BPI
BRAF
BRCA1
BRCA2
BRCA3
BRCATA
BRCAX
BRD8
BRF2
BRIP1
BRMS1
BROVCA1
BROVCA2
BROVCA3
BROVCA4
BTF3
BTG2
BTG3
BTLA
BUB1
BUB1B
BUB3
BWSCR1A
BYSL
BZW1
C10orf116
C11ORF30
C14orf115
C14orf132
C15orf17
C17orf37
C18orf1
C18orf10
C1orf38
C1QA
C1QB
C1S
C2
C20orf103
C20orf24
C20orf46
C21orf59
C21orf91
C3
C4B
C4orf7
C5orf13
C5orf5
C6orf115
C6orf146
C6orf97
C8orf4
C9orf25
C9orf46
C9orf7
CA1
CA11
CA12
CA2
CA3
CA9
CACNA1D
CACNA2D2
CACNG1
CAD
CALB2
CALCOCO1
CALCR
CALD1
CALM2
CALML5
CALR
CALU
CAMK1
CAMK1D
CAMK1G
CAMLG
CANX
CAP1
CAP2
CAPG
CAPN3
CAPN6
CARM1
CARS
CAS
CASP10
CASP14
CASP3
CASP4
CASP8
CAT
CAV1
CAV2
CBFB
CBLB
CBR1
CBR3
CBS
CBX1
CBX3
CC1
CCDC98
CCDN1
CCL1
CCL13
CCL18
CCL19
CCL2
CCL20
CCL3
CCL4
CCL5
CCNA2
CCNB1
CCNB2
CCNC
CCND1
CCND2
CCND3
CCNE1
CCNE2
CCNF
CCNG2
CCNH
CCNI
CCNO
CCR1
CCR5
CCR7
CCT2
CCT4
CCT5
CCT6A
CD14
CD163
CD164
CD180
CD19
CD1C
CD2
CD200
CD24
CD36
CD37
CD3D
CD3G
CD4
CD40
CD44
CD48
CD52
CD53
CD63
CD68
CD69
CD74
CD82
CD83
CD86
CD8A
CD93
CDC14A
CDC16
CDC2
CDC20
CDC25A
CDC25B
CDC25C
CDC27
CDC34
CDC42BPB
CDC42EP1
CDC45L
CDCA8
CDH1
CDH11
CDH19
CDH3
CDH6
CDK11A
CDK11B
CDK2
CDK2AP1
CDK2AP2
CDK4
CDK6
CDK7
CDKL2
CDKN1A
CDKN1B
CDKN1C
CDKN2
CDKN2A
CDKN2B
CDKN2C
CDKN2D
CDKN3
CDO1
CDS1
CDT1
CEBPB
CEBPG
CEBPZ
CELSR1
CELSR2
CENPA
CENPE
CENPF
CENTD1
CENTG1
CEP110
CEP250
CERD4
CES1
CES2
CETN2
CETN3
CFC2
CFLAR
CGA
CGB
CGB1
CGB5
CHAD
CHAF1A
CHAF1B
CHD6
CHDH
CHEK1
CHEK2
CHGA
CHGB
CHI3L1
CHI3L2
CHIC2
CHK2
CHKA
CHL1
CHN1
CHN2
CHORDC1
CHPT1
CHRD
CHST2
CHST3
CHUK
CIB1
CIRBP
CISH
CITED1
CKAP2
CKAP5
CKS1B
CKS2
CLASP1
CLCA2
CLCN4
CLDN1
CLDN10
CLDN4
CLEC16A
CLEC3B
CLGN
CLIC1
CLIC4
CLN3
CLNS1A
CLOVE
CLPTM1L
CLSPN
CLTC
CLU
CMM6
CNBP
CNGB1
CNN1
CNN3
CNNM4
CNO
CNTNAP1
CNTNAP4
CNTROB
COASY
COG1
COL14A1
COL17A1
COL18A1
COL1A1
COL1A2
COL23A1
COL3A1
COL4A1
COL4A5
COL5A1
COL5A2
COL6A3
COL9A3
COMT
COPB2
COPG
CORO1A
CORO1C
COX11
COX4I1
COX6A1
COX6C
COX7A2L
CP
CPA4
CPB1
CPE
CPM
CRABP1
CRAC1
CRAT
CREB1
CREB3L2
CREB3L4
CREBBP
CREBL2
CRELD1
CRIP1
CRIP2
CRKAS
CRKRS
CRLF3
CROT
CRP
CRY2
CRYAA
CRYAB
CRYM
CS
CSDA
CSE1L
CSF1R
CSH1
CSK
CSNK1D
CSNK1E
CSNK2A1
CSPG4
CSRP2
CST3
CST4
CST6
CSTA
CSTB
CSTF1
CSTF3
CTAG2
CTBP2
CTCF
CTCFL
CTDSP1
CTDSPL
CTGF
CTLA4
CTNNA1
CTNNAL1
CTNNB1
CTPS
CTSB
CTSC
CTSD
CTSE
CTSF
CTSK
CTSL2
CTSS
CTSZ
CTTN
CUL2
CUL4A
CWF19L2
CWS5
CWS6
CX3CL1
CX3CR1
CXADR
CXCL10
CXCL11
CXCL12
CXCL2
CXCL3
CXCL6
CXCL9
CXCR4
CXCR6
CXXC5
CYB5R1
CYB5R2
CYBA
CYBB
CYFIP1
CYP11A1
CYP11B1
CYP11B2
CYP17
CYP17A1
CYP19A1
CYP1A1
CYP1A2
CYP1B1
CYP24A1
CYP27A1
CYP2B6
CYP2C19
CYP2C8
CYP2C9
CYP2D6
CYP2E1
CYP39A1
CYP3A
CYP3A4
CYP3A5
CYP3A7
CYP4A11
CYP4B1
CYP51A1
CYR61
CYTB
DAB2
DACH1
DAG1
DAM1
DAPK1
DBC1
DCC
DCI
DCK
DCLRE1C
DCN
DCPS
DCTD
DCTN1
DCTN5
DDB1
DDB2
DDIT3
DDR1
DDR2
DDX11
DDX21
DDX39
DDX5
DEAF1
DEFB1
DEK
DENND2A
DENND3
DGCR8
DGKD
DGKQ
DHCR24
DHCR7
DHFR
DHPS
DHRS2
DHRS4
DHRS7
DHTR
DHX9
DIA4
DIAPH2
DIO1
DIRAS3
DKC1
DKK1
DKK3
DLC1
DLG1
DLG3
DLL1
DMBT1
DMC1
DMD
DMN
DMTF1
DNAJA2
DNAJA4
DNAJB11
DNAJB2
DNALI1
DNASE1
DNM1L
DNM2
DNMT1
DNMT3A
DNMT3B
DOCK2
DOK1
DPAGT1
DPM1
DPP4
DPYD
DPYSL2
DRAP1
DRD2
DRD3
DRG1
DSC2
DSC3
DSG2
DSG3
DSS1
DST
DTL
DTX2
DUSP1
DUSP13
DUSP2
DUSP23
DUSP4
DUSP9
DYSF
E2F1
E2F2
E2F3
E2F5
EBAG9
EBI2
EBI3
ECAD
ECE1
ECHDC1
ECHDC2
ECM1
ECT2
EDN1
EDN2
EDNRB
EED
EEF1A2
EEF1D
EEF2
EFNB1
EFS
EGF
EGFL6
EGFR
EGLN2
EGR1
EGR2
EHF
EHMT1
EHMT2
EIF1
EIF1AY
EIF2B3
EIF2C2
EIF3G
EIF4A1
EIF5A
ELAVL1
ELF3
ELMO1
ELOVL2
ELOVL5
EME1
EMG1
EML2
EML4
EMP2
EMS1
ENAH
ENC1
ENDOSTATIN
ENO1
ENPP1
ENPP2
ENSA
EP300
EPB42
EPHA1
EPHA10
EPHA2
EPHB3
EPHB4
EPHX1
EPHX2
EPM2AIP1
EPRS
EPSTI1
ER
ERBA
ERBB
ERBB2
ERBB3
ERBB4
ERCC1
ERCC2
ERCC3
ERCC4
ERCC5
ERCC6
ERCC8
ERO1L
ESM1
ESPL1
ESR
ESR1
ESR2
ESRRG
ESTRR
ETFB
ETS1
ETV6
ETV7
EVI2A
EVI2B
EVL
EVPL
EXO1
EXOSC9
EXT1
EXTL2
EYA2
EZH2
F13A1
F2
F5
FAAH
FABP1
FABP3
FABP4
FABP5
FABP7
FADD
FADS2
FAH
FAM20A
FAM49B
FAM4A1
FANCA
FANCB
FANCC
FANCD1
FANCD2
FANCE
FANCF
FANCG
FANCI
FANCJ
FANCL
FANCM
FANCN
FANCO
FAP
FARP1
FARP2
FAS
FASLG
FASN
FBL
FBLN1
FBN1
FBP1
FBXL2
FBXL20
FBXL5
FBXL7
FBXO10
FBXO3
FBXO5
FBXW7
FCER1A
FCGR1A
FCGR1B
FCGR2A
FCGR2B
FCGR3A
FCGR3B
FCHO1
FCRL3
FDPS
FDX1
FDXR
FEN1
FER1L3
FEZ1
FGD3
FGF18
FGF4
FGF8
FGFBP1
FGFR1
FGFR2
FGFR3
FGFR4
FGL2
FHIT
FHL1
FHL2
FIGN
FKBP5
FLII
FLNA
FLNB
FLOT2
FLT1
FMNL1
FMO5
FMOD
FMR1
FN1
FOLR1
FOSB
FOXA1
FOXC1
FOXJ1
FOXM1
FOXP3
FRK
FRZB
FSCN1
FSHB
FSHR
FUCA1
FUT2
FUT3
FUT4
FUT8
FXR2
FXYD1
FXYD3
FXYD5
FZD9
FZR1
GABRE
GABRP
GAD1
GADD45A
GADD45B
GADD45G
GALC
GALE
GALK1
GALNT10
GALNT2
GALNT3
GAP43
GAPDH
GARS
GART
GAS8
GAST
GATA3
GATA6
GBP1
GBP2
GC
GCAT
GCH1
GCLM
GCSH
GDF15
GDF5
GDI1
GDI2
GEM
GEN1
GFAP
GFOD1
GFRA1
GGCX
GGH
GH1
GHR
GHRH
GHRHR
GHRL
GHSR
GIPC1
GIPC3
GIT2
GJA1
GJB1
GJB2
GLA
GLDC
GLG1
GLI3
GLIPR1
GLM3
GLMN
GLO1
GLRB
GLRX
GLRX2
GLS
GLUD1
GLUL
GM2A
GMDS
GMFG
GMNN
GNA11
GNA12
GNA15
GNAI3
GNAS
GNB2L1
GNB3
GNB4
GNG11
GNPTAB
GNRH1
GNRHR
GNS
GOLGA1
GOLGA3
GOLGA4
GOSR1
GOT2
GP1BA
GPA33
GPC1
GPC4
GPD1
GPER
GPI
GPR126
GPR160
GPRC5A
GPRC5B
GPSM2
GPX1
GPX2
GPX3
GPX4
GRB10
GRB14
GRB2
GRB7
GREM1
GRHL1
GRIK1
GRIP1
GRK6
GRP
GRPR
GSK3B
GSN
GSR
GSS
GSTA1
GSTA2
GSTA3
GSTM1
GSTM2
GSTM3
GSTM4
GSTM5
GSTO1
GSTO2
GSTP1
GSTT1
GSTZ1
GTF2A1
GTF2B
GTF2E1
GTF2E2
GTF2F1
GTF2I
GTPBP4
GUCY2F
GULP1
GYPC
GZMA
GZMB
GZMK
H19
H2AFX
H2AFZ
HAAO
HADHA
HAGH
HARS
HBA2
HCCS
HCK
HCLS1
HCN1
HDAC1
HDAC11
HDAC2
HDAC3
HDGF
HDGFRP3
HEBP1
HEBP2
HECA
HER2
HERC5
HEXB
HEXIM1
HEY1
HFE
HGF
HHEX
HIC1
HIF1A
HIPK1
HIST1H1A
HIST1H1B
HIST1H1E
HIST1H2AC
HIST1H2AD
HIST1H2AK
HIST1H2BD
HIST1H4B
HIST2H2BE
HK1
HK2
HK3
HLA-A
HLA-B
HLA-C
HLA-DPB1
HLA-DQA1
HLA-DQB1
HLA-DRB1
HLF
HMBS
HMGA1
HMGB1
HMGB3
HMGCL
HMGCS2
HMGN1
HMGN3
HMMR
HMOX1
HN1
HNF4A
HNRNPC
HNRPDL
HOXA5
HOXB13
HOXB2
HOXC6
HP
HPN
HPRL
HPSE
HR54
HRAD54
HRAS
HRASLS
HRASLS3
HRB
HRK
HSD11B1
HSD11B2
HSD17B1
HSD17B12
HSD17B2
HSD17B3
HSD17B4
HSD17B7
HSD17B8
HSD3B1
HSD3B2
HSP90AA1
HSPA1A
HSPA4
HSPA8
HSPB1
HSPB8
HSPC159
HSPG2
HSPH1
HTATIP2
HTR3A
HTR3B
HTR3C
HTR3D
HTR3E
HTRA1
HUS1
HYAL1
HYOU1
HYSP1
IARS
ICA1
ICAM1
ICAM2
ICAM5
ID4
IDH2
IDI1
IDS
IDUA
IER3
IFI16
IFI27
IFI30
IFI44
IFITM1
IFITM3
IFNAR2
IFNG
IFNGR2
IFRD1
IGBP1
IGF1
IGF1R
IGF2
IGF2R
IGFALS
IGFBP1
IGFBP2
IGFBP3
IGFBP4
IGFBP5
IGFBP6
IGFBP7
IGHMBP2
IGJ
IGK@
IGLL1
IHPK2
IKBKB
IKBKE
IKZF3
IL10
IL10RA
IL12A
IL12B
IL12RB2
IL13
IL13RA1
IL15RA
IL17A
IL17RB
IL18
IL1A
IL1B
IL1R1
IL1RL1
IL1RN
IL2
IL20
IL23R
IL27RA
IL2RB
IL2RG
IL32
IL4
IL4R
IL5
IL6
IL6ST
IL7R
IL8
IL8RB
ILF2
ILF3
IMPA2
IMPDH2
IMPT1
ING1
ING2
INHA
INHBA
INHBB
INHBC
INPP1
INPP4B
INS
INSIG2
INSR
INT2
Intergenic
IRAK1
IRAK3
IREB2
IRF1
IRF5
IRS1
IRS2
IRX5
ISG20
ITGA2
ITGA3
ITGA6
ITGA7
ITGAL
ITGAV
ITGAX
ITGB1BP1
ITGB2
ITGB3
ITGB4
ITGB5
ITGB8
ITGBL1
ITIH4
ITM2A
ITPK1
ITPR1
ITPR3
ITSN2
IVNS1ABP
JAK2
JARID1B
JMJD2B
JMY
JRKL
JUB
JUN
JUNB
JUND
KAL1
KARS
KATNA1
KATNB1
KBTBD2
KCNAB2
KCNJ15
KCNJ3
KCNK1
KCNK5
KCNK9
KCNN4
KCNQ2
KCNS1
KCTD3
KCTD9
KD
KDELR3
KDR
KHDRBS3
KIAA0020
KIAA0040
KIAA0090
KIAA0100
KIAA0101
KIAA0125
KIAA0141
KIAA0182
KIAA0195
KIAA0203
KIAA0232
KIAA0241
KIAA0265
KIAA0423
KIAA0649
KIAA0746
KIAA0802
KIAA0922
KIAA1143
KIAA1217
KIAA1324
KIAA1467
KIAA1522
KIAA1609
KIAA1967
KIF11
KIF1B
KIF2
KIF20A
KIF21A
KIF23
KIF2C
KIF3B
KIF3C
KIF5B
KIFC1
KISS1
KIT
KITLG
KL
KLF10
KLF11
KLF4
KLF5
KLF6
KLF7
KLF9
KLHDC2
KLHL2
KLK10
KLK12
KLK13
KLK2
KLK3
KLK4
KLK5
KLK6
KLK7
KLK8
KLKB1
KLRD1
KPNB1
KRAS
KRAS2
KRT13
KRT14
KRT16
KRT17
KRT18
KRT19
KRT20
KRT23
KRT5
KRT6B
KRT7
KRT8
KYNU
LAD1
LAMA3
LAMA5
LAMB2
LAMC2
LAMP2
LAMP3
LANCL1
LAPTM5
LAR
LASP1
LASS2
LATS1
LATS2
LBR
LCAM
LCK
LCN2
LCP1
LCT
LDB2
LDHA
LDHB
LDLR
LDOC1
LENG4
LEP
LEPR
LFNG
LFS1
LFS2
LGALS1
LGALS3
LGALS3BP
LGALS4
LGALS9
LHCGR
LIF
LIG1
LIG3
LIG4
LILRA4
LILRB2
LILRB4
LILRB5
LIMK1
LIMK2
LIN7A
LIPA
LIPE
LIPG
LMNA
LMO4
LMYC
LOC134997
LOC220594
LOC51149
LOC643714
LOX
LPHN2
LPIN1
LPL
LPXN
LRBA
LRIG1
LRP1
LRP10
LRP2
LRPAP1
LRRC17
LRRC32
LSM1
LSM2
LSM3
LSP1
LTA
LTBR
LTF
LUM
LY6D
LY6E
LY75
LYAR
LYN
LYPLA1
LYZ
LZTFL1
LZTR1
LZTS1
LZTS2
M6P
M6PR
MAD2L1
MAD2L2
MADD
MAGED2
MAGOH
MAL2
MAN1A2
MAN2C1
MAOA
MAP1B
MAP2K2
MAP2K3
MAP2K4
MAP3K1
MAP3K12
MAP3K13
MAP3K14
MAP3K5
MAP3K6
MAP3K8
MAPK1
MAPK10
MAPK13
MAPK6
MAPK8
MAPK9
MAPRE1
MAPRE2
MAPT
MARCO
MAST2
MAT2A
MATK
MBD1
MBD2
MBL2
MBP
MBTPS1
MC1R
MC2R
MCAP
MCC
MCCC1
MCF2
MCH5
MCM
MCM2
MCM3
MCM4
MCM5
MCM6
MCM7
MCMTC
MCPH1
MDM2
MDM4
MED1
MEF2A
MEF2B
MEF2C
MEFV
MEIS2
MEIS3
MELK
MEST
MET
MFAB
MFAP2
MFAP4
MFAP5
MFGE8
MFNG
MGAT4A
MGC42105
MGLL
MGMT
MGST1
MICA
MID1
MIF
MINK1
MIPEP
MKI67
MKNK2
MLANA
MLF2
MLH1
MLH3
MLLT10
MLLT11
MLLT3
MLLT4
MLLT6
MLXIPL
MME
MMP1
MMP12
MMP13
MMP14
MMP15
MMP19
MMP2
MMP21
MMP3
MMP7
MMP8
MMP9
MN1
MNAT1
MORF4L2
MPDU1
MPDZ
MPG
MPHOSPH6
MPI
MPO
MPP2
MPZL1
MRAS
MRC1
MRE11A
MRMV2
MRPL11
MRPL23
MRPL37
MRPS27
MRPS30
MS
MS4A1
MSH2
MSH3
MSH6
MSLN
MSN
MSX1
MSX2
MT1G
MT2A
MTA1
MTA3
MTCH2
MTF2
MTHFD1
MTHFD2
MTHFR
MTIF2
MTL5
MTMR2
MTMR4
MT-ND2
MT-ND3
MTR
MTRF1L
MTRR
MTSS1
MTUS1
MTX1
MUC1
MUC5AC
MUC6
MUCL1
MUS81
MUT
MUTYH
MVP
MX1
MX2
MXI1
MYBL1
MYBL2
MYC
MYCBP
MYCL1
MYCN
MYD88
MYH7B
MYH9
MYL3
MYL6
MYLIP
MYLK2
MYO3A
MYO5B
MYO6
MYO9A
MYOD1
MYRIP
MYT1
NA
NABC1
NAGA
NAP1L1
NARF
NASP
NAT1
NAT2
NAV1
NBEA
NBL1
NBN
NBS1
NCAPD2
NCDN
NCF2
NCF4
NCK1
NCL
NCOA1
NCOA2
NCOA3
NCOA6
NCOR1
NCOR2
ND1
ND3
ND5
NDC80
NDRG1
NDRG2
NDUFA4
NDUFA7
NDUFA9
NDUFB1
NDUFS1
NEBL
NEDD4L
NEIL1
NEIL2
NEK10
NEK2
NEK4
NEK7
NEK9
NELL2
NEU
NEUROD2
NF2
NFATC1
NFATC3
NFATC4
NFE2L2
NFE2L3
NFIB
NFIC
NFIL3
NFIX
NFKB1
NFKBIA
NFKBIE
NIN
NMB
NME1
NME3
NMI
NMOR1
NMOR2
NMT2
NMU
NNMT
NOD2
NOLC1
NOS1
NOS2A
NOS3
NOTCH1
NOTCH2
NOVA1
NPAS2
NPDC1
NPM1
NPM2
NPR1
NPR3
NPTX1
NPY1R
NQO1
NQO2
NR1I2
NR1I3
NR3C1
NR4A1
NRAS
NRG1
NRIP1
NRP1
NRP2
NRXN2
NS
NSF
NSP2
NT5C
NTN4
NTRK2
NTRK3
NUAK2
NUDCD1
NUDT1
NUDT2
NUF2
NUMA1
NUMBL
NUP155
NUP160
NUP205
NUSAP1
NUTF2
OAS2
ODC1
ODF2L
OGG1
OGN
OGT
OLFM1
OMD
OPRS1
OR10J3
ORC6L
ORM1
OSBP
OSBPL3
OSBPL7
OTUB1
OVOL2
OXCT1
P2RX4
P2RY6
P4HB
P5.8
P53
p65
PACSIN3
PADI2
PAI1
PAK1
PAK1IP1
PALB2
PALM
PALM2
PANK3
PAQR3
PARD3
PARK7
PARP1
PARP14
PARVB
PAX5
PBK
PBOV1
PBRM1
PBX1
PCAF
PCBP1
PCBP2
PCDH1
PCDH8
PCNA
PCNT
PCNXL3
PCOLCE2
PCSK6
PCTK1
PDCD10
PDCD1LG2
PDCD4
PDCD5
PDE4B
PDE6B
PDE8B
PDGFB
PDGFRB
PDGFRL
PDHA1
PDIA4
PDIA5
PDK3
PDK4
PDLIM1
PDLIM3
PDPK1
PDS
PDZK1
PEA15
PECAM1
PECI
PELP1
PEMT
PER1
PER2
PERLD1
PERP
PES1
PEX12
PEX13
PEX19
PFDN2
PFKL
PFN1
PGAM2
PGC
PGF
PGK1
PGM1
PGM3
PGR
PH-4
PHB
PHF15
PHGDH
PHKG2
PHYH
PIB5PA
PICALM
PIG3
PIGH
PIGT
PIK3CA
PIK3CB
[truncated: 950 more rows]

## Sheet: Hallmark genes
Hallmark genes
2016-12-01
AATF
ABCA1
ABI1
ABI2
ABI3
ABL1
ABL2
ABR
ABRA
ACCN2
ACCN3
ACIN1
ACR
ACTL6A
ACVR1
ACVR1B
ACVR2A
ACVR2B
ACVRL1
ADAM10
ADAM11
ADAM9
ADAMTS1
ADAMTS8
ADAP1
ADCY7
ADCYAP1
ADIPOR1
ADIPOR2
ADM
ADORA1
ADORA2A
ADORA2B
ADORA3
ADRA1A
ADRA1B
ADRA1D
ADRA2A
ADRA2B
ADRA2C
ADRB1
ADRB2
ADRB3
ADRBK1
ADRBK2
AFAP1L2
AGAP2
AGER
AGGF1
AGRN
AGRP
AGT
AGTR1
AIF1
AIFM1
AIFM3
AIMP1
AKAP10
AKAP11
AKAP12
AKAP4
AKAP7
AKAP8
AKAP9
AKT1
AKT1S1
AKT3
ALB
ALCAM
ALKBH1
ALOX12
ALOX15B
ALS2
ALX1
AMBP
AMFR
AMHR2
AMIGO1
AMIGO2
AMIGO3
AMOT
ANG
ANGPT1
ANGPT2
ANGPTL3
ANGPTL4
ANKRD1
ANP32A
ANXA1
ANXA3
ANXA4
ANXA5
ANXA9
AP3S1
APAF1
APBB1
APBB2
APC
APC2
APEX1
APH1A
API5
APLN
APLNR
APOA1
APOA4
APOA5
APOC3
APOE
APOL3
APPL1
APPL2
APTX
AR
ARAP1
ARAP3
ARF6
ARFGEF2
ARFIP2
ARFRP1
ARHGAP1
ARHGAP27
ARHGAP29
ARHGAP4
ARHGAP5
ARHGDIA
ARHGDIB
ARHGDIG
ARHGEF10L
ARHGEF11
ARHGEF7
ARID1A
ARL2BP
ARR3
ARRB1
ARTN
ASAH2
ASF1A
ASGR2
ASIP
ASNS
ATF6
ATF6B
ATM
ATP2C1
ATP6AP2
ATP8A2
ATPIF1
ATR
ATRIP
ATRX
ATXN3
AVEN
AVP
AVPR1A
AVPR1B
AVPR2
AXIN2
AXL
AZU1
B4GALNT2
B4GALT7
BAD
BAG1
BAG4
BAI1
BAIAP2
BAK1
BAP1
BARD1
BAX
BBC3
BCAM
BCAR1
BCAR3
BCL10
BCL2
BCL2A1
BCL2L1
BCL2L10
BCL2L2
BCL3
BCL6
BDKRB2
BECN1
BFAR
BID
BIK
BIRC2
BIRC3
BIRC5
BIRC6
BLK
BLM
BLNK
BMI1
BMP1
BMP10
BMP2
BMP4
BMP7
BMPR1A
BMPR2
BNC1
BNIP1
BNIP2
BNIP3
BNIP3L
BNIPL
BRAF
BRAP
BRCA1
BRCA2
BRD8
BRE
BRSK1
BSG
BST2
BTC
BTG1
BTG2
BTG3
BTG4
BTK
BTRC
BUD31
C16orf5
C3
C3AR1
C4BPB
C5
C5AR1
CABP2
CABP5
CACNA1I
CADM1
CADM3
CALCA
CALCB
CALCOCO1
CALCR
CALCRL
CALM3
CALML5
CALY
CAMK1
CAMK2B
CAMK4
CAMKK2
CANT1
CAP1
CAP2
CAPN1
CAPN5
CAPNS1
CAPRIN2
CAPS
CARD10
CARD8
CARD9
CARHSP1
CARTPT
CASKIN1
CASP1
CASP2
CASP3
CASP7
CASP8
CASP8AP2
CASP9
CASR
CBL
CBLC
CBX4
CBY1
CC2D1A
CCBP2
CCDC88A
CCK
CCKAR
CCKBR
CCL1
CCL11
CCL13
CCL14
CCL15
CCL17
CCL18
CCL19
CCL2
CCL20
CCL22
CCL23
CCL24
CCL25
CCL3
CCL3L3
CCL4
CCL5
CCL7
CCL8
CCM2
CCNA2
CCND1
CCND2
CCND3
CCNO
CCR1
CCR10
CCR2
CCR3
CCR5
CCR6
CCR8
CCR9
CCRL1
CCRL2
CD101
CD14
CD160
CD164
CD19
CD2
CD209
CD226
CD24
CD244
CD27
CD274
CD276
CD28
CD2AP
CD33
CD34
CD36
CD3E
CD3EAP
CD3G
CD40
CD40LG
CD47
CD59
CD70
CD74
CD79A
CD81
CD83
CD84
CD86
CD93
CDA
CDC123
CDC25B
CDC42BPA
CDC42BPB
CDC42BPG
CDC42EP3
CDC42SE1
CDC42SE2
CDC45
CDC6
CDC7
CDH13
CDH5
CDHR2
CDK1
CDK10
CDK11A
CDK11B
CDK13
CDK2
CDK2AP1
CDK4
CDK5R1
CDK5RAP1
CDK6
CDKL2
CDKN1A
CDKN1B
CDKN1C
CDKN2A
CDKN2AIP
CDKN2B
CDKN2C
CDKN2D
CDKN3
CDS1
CDSN
CDT1
CEACAM6
CEBPG
CECR2
CELSR1
CEP57
CERCAM
CFL1
CFLAR
CGA
CGB
CGREF1
CGRRF1
CHEK1
CHEK2
CHL1
CHMP1A
CHP
CHRM1
CHRM2
CHRM3
CHRM4
CHRM5
CHRNA1
CHRNA2
CHRNA3
CHRNA4
CHRNA6
CHRNA7
CHRNB1
CHRNB2
CHRNB3
CHRNB4
CHRND
CHRNE
CHRNG
CHUK
CIAO1
CIAPIN1
CIB1
CIDEA
CIDEB
CITED2
CKLF
CLCF1
CLDN1
CLDN10
CLDN11
CLDN12
CLDN14
CLDN15
CLDN16
CLDN17
CLDN18
CLDN19
CLDN2
CLDN20
CLDN22
CLDN23
CLDN3
CLDN4
CLDN5
CLDN6
CLDN7
CLDN8
CLDN9
CLEC11A
CLEC1A
CLEC1B
CLEC2D
CLEC4A
CLEC5A
CLEC7A
CLIC1
CLIC2
CLIC3
CLIC4
CLN3
CLNK
CLOCK
CNGA3
CNKSR1
CNOT7
CNOT8
CNR1
CNR2
CNTN4
CNTNAP1
COL11A1
COL13A1
COL16A1
COL18A1
COL4A3
COMMD7
COPS3
CORO1C
CORO2A
CORT
CRABP1
CRABP2
CREB1
CREBL2
CREM
CRH
CRHBP
CRHR1
CRHR2
CRIPAK
CRK
CRKL
CRNN
CRYAA
CRYAB
CSF1
CSF1R
CSF3
CSNK1D
CSNK1E
CSNK1G2
CSNK1G3
CSNK2A1
CSNK2A2
CSNK2B
CTBP1
CTBP2
CTF1
CTNNA3
CTNNB1
CTNNBIP1
CTNND2
CUL1
CUL2
CUL3
CUL4A
CUL5
CX3CL1
CX3CR1
CXCL1
CXCL10
CXCL11
CXCL12
CXCL14
CXCL5
CXCL6
CXCL9
CXCR2
CXCR4
CXCR5
CXCR6
CXXC5
CYCS
CYFIP2
CYTL1
DAD1
DAPK1
DAPK2
DAPK3
DAPP1
DAXX
DBNL
DCBLD2
DDAH1
DDAH2
DDB1
DDB2
DDR2
DDX11
DDX54
DEDD2
DEFB1
DEFB4A
DEK
DERL1
DERL2
DERL3
DFFA
DFFB
DGKA
DGKK
DHCR24
DHPS
DHRS2
DIABLO
DIRAS3
DLC1
DLEC1
DLG1
DLG4
DLG5
DLL4
DMPK
DNAJA2
DNM1L
DOCK1
DOCK2
DOK1
DOK2
DPYSL2
DPYSL3
DPYSL5
DRD1
DRD2
DRD3
DRD4
DRD5
DRG2
DTNA
DTX1
DUOX1
DUOX2
DUSP10
DUSP16
DUSP2
DUSP22
DUSP4
DUSP6
DUSP8
DUSP9
DYRK2
EBI3
ECEL1
ECM1
ECT2
EDA
EDA2R
EDARADD
EDN1
EDN2
EDN3
EDNRA
EDNRB
EEF1D
EEF1E1
EFNB3
EFS
EGF
EGFR
EGR4
EID2
EIF2AK2
EIF2AK3
EIF4G2
ELANE
ELK3
ELMO1
EMCN
EMP3
ENG
ENO1
ENPEP
ENPP2
ENPP7
ENTPD1
EPAS1
EPGN
EPHA1
EPHA2
EPHA3
EPHA4
EPHB1
EPHB3
EPS15
EPS8
ERBB2
ERBB2IP
ERBB3
ERBB4
ERC1
ERCC1
ERCC2
ERCC3
ERCC4
ERCC5
ERCC6
ERCC8
EREG
ERG
ERN1
ESR1
ESR2
ETS1
EXO1
EXT1
EXT2
F10
F12
F13A1
F13B
F2
F2R
F2RL1
F2RL2
F2RL3
F5
F7
F8
F9
FABP3
FABP6
FABP7
FADD
FAF1
FAIM3
FAM107A
FANCA
FANCC
FANCG
FARP2
FAS
FASLG
FASTK
FCGR1A
FCGR2B
FEN1
FER
FEZ1
FEZ2
FFAR1
FFAR2
FFAR3
FGD1
FGD2
FGD4
FGD5
FGD6
FGF10
FGF11
FGF12
FGF13
FGF14
FGF16
FGF17
FGF18
FGF2
FGF20
FGF21
FGF3
FGF4
FGF5
FGF6
FGF7
FGF9
FGFBP1
FGFR1
FGFR1OP
FGFR3
FGFR4
FIBP
FIGF
FKBP1A
FKBP8
FLNA
FLNB
FLT1
FLT3
FLT3LG
FLT4
FMOD
FNTA
FOSL1
FOXC1
FOXC2
FOXH1
FOXL2
FOXN3
FOXO1
FOXO4
FOXP3
FPR1
FPR2
FPR3
FRK
FRS2
FRS3
FRZB
FSHB
FSHR
FTH1
FYB
FYN
G3BP1
GAB1
GABBR1
GABBR2
GABRA1
GABRA2
GABRA3
GABRA4
GABRA5
GABRA6
GABRB1
GABRB2
GABRB3
GABRD
GABRE
GABRG2
GABRQ
GABRR1
GABRR2
GADD45A
GADD45B
GADD45G
GALR1
GALR2
GALR3
GAP43
GAS1
GAS6
GAS7
GAS8
GCG
GCGR
GCLC
GDF10
GDF15
GDF5
GDF9
GDI1
GDI2
GDNF
GEM
GFRA2
GFRA3
GGCX
GH1
GHRH
GHRHR
GHRL
GHSR
GIP
GIPR
GIT1
GIT2
GJA1
GKAP1
GLI1
GLI2
GLI3
GLMN
GLO1
GLP1R
GLP2R
GLRA1
GLRA2
GLRB
GMFB
GMIP
GML
GMNN
GNA11
GNA12
GNA13
GNA14
GNA15
GNAI2
GNAI3
GNAL
GNAQ
GNAS
GNAZ
GNB1
GNB2
GNB3
GNG10
GNG11
GNG12
GNG3
GNG4
GNG7
GNL1
GNRH1
GNRH2
GNRHR
GOLT1B
GP1BA
GP6
GP9
GPER
GPNMB
GPR1
GPR12
GPR123
GPR143
GPR15
GPR17
GPR173
GPR176
GPR183
GPR19
GPR20
GPR21
GPR22
GPR25
GPR27
GPR3
GPR31
GPR32
GPR34
GPR35
GPR37
GPR39
GPR4
GPR42
GPR44
GPR45
GPR50
GPR52
GPR55
GPR6
GPR65
GPR68
GPR75
GPR85
GPR89A
GPRC5A
GPRC5C
GPS1
GPS2
GPSM2
GPX1
GRAP
GRAP2
GRB10
GRB14
GRB2
GRB7
GRIA1
GRIA2
GRIA3
GRIA4
GRID2
GRIK1
GRIK2
GRIK3
GRIK4
GRIN2A
GRIN2B
GRIN2C
GRK1
GRK4
GRK5
GRK6
GRM1
GRM2
GRM3
GRM4
GRM5
GRM6
GRM7
GRM8
GRP
GRPR
GSG2
GSK3B
GSTP1
GTF2H1
GTF2H4
GTF2I
GTPBP1
GTPBP2
GTPBP4
GUCA1B
GUCA1C
GUCY1A3
GUCY1B3
GUCY2C
GUCY2D
GUCY2F
GZMA
GZMB
HBEGF
HBS1L
HBXIP
HCAR3
HCFC1
HCLS1
HCRTR1
HCRTR2
HDAC1
HDAC3
HEXIM1
HEXIM2
HGF
HGS
HINT1
HIP1
HIPK2
HIPK3
HMGB1
HMGB1P10
HMGB2
HMGCR
HMOX1
HNF4A
HNRNPAB
HNRNPK
HOMER1
HOMER2
HOMER3
HOXC10
HPGD
HRAS
HRH1
HRH2
HRH3
HRK
HSP90B1
HSPA1B
HSPA9
HSPB1
HTATIP2
HTR1A
HTR1B
HTR1D
HTR1E
HTR1F
HTR2A
HTR2B
HTR4
HTR5A
HTR6
HTR7
HUNK
HUS1
IAPP
ICK
ICOSLG
IER3
IFI16
IFI6
IFITM1
IFNA2
IFNAR1
IFNAR2
IFNB1
IFNG
IFNGR1
IFNGR2
IFNK
IFNW1
IFT57
IGF1
IGF1R
IGF2
IGF2R
IGFALS
IGFBP1
IGFBP4
IGFBP6
IGFBP7
IGHMBP2
IGSF1
IGSF6
IKBKE
IKBKG
IL10
IL10RB
IL11
IL12A
IL12B
IL12RB1
IL12RB2
IL13RA1
IL15
IL15RA
IL17C
IL17F
IL18
IL18R1
IL18RAP
IL1A
IL1B
IL1RL1
IL1RL2
IL2
IL20
IL21
IL22RA2
IL27RA
IL29
IL2RA
IL2RB
IL3
IL31RA
IL4
IL4R
IL5RA
IL6
IL6R
IL6ST
IL7
IL7R
IL8
IL9
IL9R
IMPA1
IMPA2
ING1
ING2
ING4
ING5
INHA
INHBA
INPP1
INPP4A
INPP4B
INPP5D
INS
INSL4
INSR
IP6K2
IPO7
IPO8
IQGAP1
IQGAP2
IRAK1
IRAK1BP1
IRAK2
IRAK3
IRF9
IRS1
IRS2
IRS4
ITGA2
ITGB1
ITGB1BP1
ITGB1BP2
ITGB2
ITGB3
ITGB3BP
ITPK1
ITPKA
ITPKB
ITPR2
ITPR3
JAK2
JMY
KAL1
KALRN
KAT2B
KAT5
KCNIP1
KCNIP2
KCNIP3
KDR
KHDRBS1
KIAA1804
KIFAP3
KIR2DL4
KIT
KITLG
KLF10
KLF11
KLF4
KLK8
KLRAP1
KLRB1
KLRC1
KLRC2
KLRD1
KLRF1
KLRG1
KLRK1
KNG1
KRIT1
KRT18
KRT2
KRT4
L3MBTL4
LALBA
LAMA1
LAMB1
LAMC1
LANCL1
LAT
LAT2
LATS1
LATS2
LAX1
LCK
LCP2
LDOC1
LEFTY1
LEFTY2
LEPR
LETM1
LGALS1
LGALS3BP
LGALS7
LGALS9
LGR5
LHB
LHCGR
LIF
LIFR
LIG1
LIG3
LIG4
LILRA1
LILRA2
LILRA3
LILRB2
LILRB3
LILRB4
LILRB5
LIMD1
LIMK1
LITAF
LMAN1
LMO4
LPAR2
LPAR3
LPAR4
LPXN
LRP5
LRP6
LRP8
LRRN2
LST1
LTA
LTB
LTB4R
LTB4R2
LTBP2
LTBR
LTK
LY6E
LY96
LYN
LYST
MADCAM1
MADD
MAGED1
MAGI1
MAGI2-IT1
MAL
MALT1
MAML1
MAML2
MAML3
MAP2K1
MAP2K3
MAP2K4
MAP2K5
MAP2K6
MAP2K7
MAP3K10
MAP3K11
MAP3K12
MAP3K13
MAP3K2
MAP3K3
MAP3K4
MAP3K5
MAP3K6
MAP3K7
MAP3K9
MAP4K1
MAP4K2
MAP4K3
MAP4K4
MAP4K5
MAPK1
MAPK10
MAPK11
MAPK12
MAPK13
MAPK14
MAPK6
MAPK7
MAPK8
MAPK8IP1
MAPK8IP2
MAPK8IP3
MAPK9
MAPKAPK2
MAPKAPK3
MAPKAPK5
MAPRE2
MARCO
MARK1
MARK2
MARK4
MAS1
MAST1
MATK
MAVS
MBIP
MC1R
MC2R
MC3R
MC4R
MC5R
MCC
MCHR1
MCL1
MCM3
MCTS1
MDFI
MDFIC
MDGA1
MDM2
MDM4
MED1
MED12
MED13
MED14
MED16
MED17
MED24
MED30
MED4
MERTK
MFN2
MGP
MGST2
MGST3
MIA3
MIB2
MIER1
MIF
MINK1
MKNK1
MKNK2
MLF1
MLH1
MLLT4
MLN
MLNR
MMRN1
MMS19
MNAT1
MNT
MOAP1
MPG
MPL
MPO
MPP1
MPP2
MPP3
MPZL1
MPZL2
MRAS
MRE11A
MS4A2
MSH2
MSH3
MSH5
MSH6
MST1R
MTA1
MTCH1
MTNR1A
MTNR1B
MTSS1
MUL1
MUSK
MUTYH
MX1
MXD4
MXI1
MYC
MYD88
MYH9
MYO16
MYO18A
MYO6
MYO9B
NAE1
NAIP
NAMPT
NAP1L1
NBN
NCAM2
NCK1
NCK2
NCKIPSD
NCR1
NCR2
NCSTN
NDFIP1
NDFIP2
NDN
NDP
NDUFA13
NDUFS3
NDUFS4
NEDD9
NEK11
NEK6
NET1
NEXN
NF1
NF2
NFAM1
NFATC1
NFKB1
NFKBIB
NHEJ1
NINJ2
NLGN1
NLK
NLRC3
NLRC4
NLRP12
NMB
NMBR
NME1
NME2
NME5
NMI
NMU
NMUR1
NMUR2
NOD1
NOD2
NOL3
NOL8
NOP2
NOTCH1
NOTCH2
NOX4
NPBWR1
NPBWR2
NPFF
NPFFR2
NPM1
NPR2
NPTN
NPY
NPY1R
NPY2R
NPY5R
NR1H4
NR1I2
NR1I3
NR2E3
NR2F1
NR2F2
NR2F6
NR3C1
NR3C2
NR4A1
NR4A3
NRD1
NRG2
NRGN
NRP1
NRP2
NRTN
NRXN1
NRXN3
NSMAF
NTF3
NTHL1
NTRK1
NTRK2
NTRK3
NTSR1
NUAK2
NUDT4
NUP62
NUP85
NUSAP1
ODZ1
OGG1
OGT
OMP
OPA1
OPHN1
OPN1LW
OPN1MW
OPN1SW
OPN3
OPRD1
OPRK1
OPRL1
OPRM1
OPTN
OR10J1
OR1D2
OR1D4
OR1D5
OR1E2
OR3A2
OR52A1
ORC1
ORC2
ORC4
ORC5
OSGIN1
OSM
OSMR
OSTF1
OTUD7B
OTX2
OXGR1
OXSR1
OXT
P2RX1
P2RX3
P2RX4
P2RX5
P2RX6
P2RX7
P2RY1
P2RY11
P2RY2
P2RY4
P2RY6
PA2G4
PABPC4
PAFAH1B1
PAG1
PAK1
PAK2
PAK4
PARD3
PARD6B
PARK7
PARP1
PARP3
PARP9
PAWR
PAX7
PCBP4
PDAP1
PDC
PDE11A
PDE4A
PDE7B
PDE9A
PDF
PDGFA
PDGFRA
PDGFRB
PDIA2
PDIA3
PDK1
PDPK1
PDS5B
PEA15
PECAM1
PEG10
PENK
PEX11A
PF4
PGF
PGR
PHB
PI4KB
PIAS1
PICK1
PIDD
PIF1
PIGU
PIK3CB
PIK3CG
PIK3R1
PIK3R2
PIK3R3
PIKFYVE
PILRA
PIM1
PINK1
PIP4K2B
PIP5K1A
PITPNC1
PKD1
PKD2L1
PKHD1
PKN1
PKN2
PKN3
PLA2G1B
PLAA
PLAGL1
PLAT
PLAU
PLCB2
PLCE1
PLCH1
PLCL1
PLD1
PLD2
PLEKHG5
PLG
PLK2
PMAIP1
PML
PMS1
PMS2
PMS2P1
PNKP
PNOC
POLA1
POLB
POLD1
POLE
POLE2
POLG
POLG2
POLH
POLI
POLL
POLQ
POMC
POU1F1
POU3F2
PPAP2A
PPAP2B
PPARG
PPARGC1A
PPARGC1B
PPFIA1
PPIC
PPM1A
PPM1D
PPM1G
PPP1R12B
PPP1R13B
PPP1R15A
PPP1R17
PPP1R1B
PPP1R9B
PPP2R3B
PPP5C
PPT1
PPYR1
PRDM4
PRDX2
PRDX4
PREX2
PRIM1
PRIM2
PRKAA1
PRKAA2
PRKAB1
PRKAB2
PRKACB
PRKAG1
PRKAG3
PRKAR1A
PRKAR2A
PRKAR2B
PRKCG
PRKCZ
PRKD3
PRKG1
PRKG2
PRKRA
PRKRIR
PRL
PRLHR
PRLR
PRMT1
PRMT2
PROC
PROK2
PROS1
PRSS2
PRSS3
PRTN3
PSEN1
PSEN2
PSENEN
PSTPIP1
PTAFR
PTCH1
PTEN
PTGER1
PTGER2
PTGER3
PTGER4
PTGES3
PTGFR
PTGIR
PTH
PTH1R
PTHLH
PTK2
PTK2B
PTK7
PTN
PTPLAD1
PTPN1
PTPN11
PTPN22
PTPN6
PTPRC
PTPRD
PTPRF
PTPRG
PTPRJ
PTPRT
PTPRU
PURA
PVRL1
PVRL2
PVRL3
PWP2
PXN
PYCARD
PYDC1
PYY
QRFP
QRFPR
QSOX1
RAB6C
RAC1
RAC2
RAD1
RAD17
RAD21
RAD23A
RAD23B
RAD50
RAD51
RAD51B
RAD51C
RAD52
RAD54B
RAD54L
RAD9A
RALA
RALB
RALBP1
RAMP1
RAN
RANBP1
RANGAP1
RAP1A
RAP1GAP
RAP2A
RAP2B
RAPGEF1
RAPGEF4
RAPGEFL1
RARB
RARRES1
RARRES3
RASA1
RASAL2
RASD1
RASGRP1
RASGRP4
RASL10A
RASSF1
RB1
RBBP4
RBBP8
RBFOX2
RBPJL
RCAN1
RCVRN
RECQL
RECQL4
RECQL5
REG1A
REG3A
REL
RELA
REN
REPS2
RERG
RET
REV1
REV3L
RFC1
RFC3
RFC4
RGMB
RGN
RGR
RGS1
RGS11
RGS12
RGS14
RGS16
RGS19
RGS2
RGS20
RGS3
RGS4
RGS5
RGS9
RHBDL1
RHEB
RHO
RHOA
RHOB
RHOC
RHOD
RHOG
RHOH
RIC8B
RICTOR
RIN1
RINT1
RIPK1
RIPK2
RIPK3
RIT1
RIT2
RND1
RND2
RNF14
RNF7
ROBO1
ROBO2
ROCK1
ROPN1B
ROR1
ROR2
ROS1
RPA1
RPA2
RPA4
RPAIN
RPL17
RPRM
RPS27
RPS6KA1
RPS6KA2
RPS6KA3
RPS6KA4
RPS6KA5
RPS6KA6
RPS6KB1
RPS6KB2
RPS6KC1
RRAD
RRAGA
RRAGB
RRAGC
RRAS
RREB1
RRH
RSU1
RTKN
RTN4
RTN4RL1
RTN4RL2
RUNDC3A
RUNX3
RUVBL2
RXFP3
RYK
S100A11
S100A2
S100A4
S100A6
S100P
S1PR1
S1PR2
S1PR3
S1PR4
SAA1
SAG
SCAP
SCG2
SCIN
SCTR
SECTM1
SELS
SEMA3B
SEMA4D
SEMA4F
SERGEF
SERPINB2
SERPINB9
SERPINE1
SERTAD1
SERTAD2
SERTAD3
SESN1
SET
SETX
SFN
SFRP1
SFRP4
SFRP5
SFTPD
SGK2
SGSM3
SH2B2
SH2D2A
SH2D3A
SH2D3C
SH3BP2
SH3BP5
SH3GL1
SH3GL2
SH3GL3
SH3GLB1
SHB
SHC1
SHC3
SHH
SHISA5
SHROOM2
SIAH1
SIAH2
SIGIRR
SIGLEC8
SIK1
SIK2
SIRPB1
SIRPG
SIT1
SKAP1
SKAP2
SKIL
SLA2
SLAMF1
SLC20A1
SLC35B2
SLC44A2
SLIT1
SLIT2
SMAD1
SMAD2
SMAD3
SMAD4
SMAD5
SMAD5-AS1
SMAD7
SMC1A
SMC3
SMPD1
SMUG1
SMURF1
SNCA
SNX6
SOCS1
SOCS2
SOCS3
SOCS5
SOCS6
SOD1
SON
SORBS1
SOS1
SOST
SPDYA
SPEG
SPG7
SPHK1
SPN
SPON2
SPRED1
SPRED2
SPRR3
SQSTM1
SRC
SRF
SRI
SRP72
SRPK1
SRPK2
SSR1
SST
SSTR1
SSTR2
SSTR3
SSTR4
SSTR5
STAM
STAMBP
STAP1
STAT1
STAT2
STAT3
STAT4
STAT5A
STAT5B
STAT6
STC1
STC2
STK11
STK17A
STK17B
STK24
STK25
STK3
STK38
STK38L
STK4
STMN1
STRN4
STUB1
STX2
STYXL1
SUFU
SUMO1
SYK
TAAR1
TAAR5
TAAR6
TAAR8
TAAR9
TAB1
TAB2
TAC3
TACR1
TACR2
TACR3
TACSTD2
TANK
TAOK2
[truncated: 225 more rows]
